# Supplementary material
Source: publisher figshare collection journal article supplement (https://geolsoc.figshare.com/ndownloader/files/30667986)
Supplement: Supplementary file 1 [file 30667986]

| Comment | No. | ThO2 | UO2 | PbO | SiO2 | CaO | La2O3 | Ce2O3 | Nd2O3 | Sm2O3 | Gd2O3 | Dy2O3 | Pr2O3 | Y2O3 | P2O5 | SO3 | Total | Age | 2 |
| --- | --- | --- | --- | --- | --- | --- | --- | --- | --- | --- | --- | --- | --- | --- | --- | --- | --- | --- | --- |
| SAR2-1 | 1 | 0.61 | 0.03 | 0.04 | 0.06 | 0.82 | 16.87 | 34.43 | 9.39 | 3.74 | 0.57 | 0.07 | 3.07 | 0.30 | 30.80 | 0.67 | 101.45 | 993 | 258 |
| SAR2-2 | 2 | 6.40 | 0.50 | 0.01 | 0.48 | 1.15 | 14.50 | 29.27 | 9.73 | 3.73 | 1.00 | 0.46 | 2.85 | 1.79 | 30.64 | 0.00 | 102.50 | 5 | 5 |
| SAR2-3 | 3 | 5.82 | 0.22 | 0.04 | 0.28 | 1.13 | 15.02 | 29.80 | 9.81 | 3.49 | 0.77 | 0.37 | 2.82 | 1.29 | 31.47 | 0.01 | 102.34 | 115 | 21 |
| SAR2-4 | 4 | 5.29 | 0.65 | 0.02 | 0.30 | 1.14 | 14.35 | 29.19 | 10.03 | 3.56 | 1.19 | 0.49 | 2.82 | 1.31 | 31.76 | 0.00 | 102.09 | 40 | 15 |
| SAR2-5 | 5 | 11.62 | 0.17 | 0.31 | 0.87 | 2.04 | 12.58 | 27.06 | 10.17 | 3.83 | 1.08 | 0.04 | 2.72 | 0.27 | 29.94 | 0.00 | 102.70 | 573 | 17 |
| SAR2-6 | 6 | 0.36 | 0.05 | 0.02 | 0.02 | 0.08 | 17.33 | 36.36 | 9.14 | 2.75 | 0.20 | 0.15 | 3.18 | 0.51 | 31.44 | 0.01 | 101.59 | 519 | 281 |
| SAR2-7 | 7 | 0.00 | 0.00 | 0.32 | 0.12 | 0.52 | 0.00 | 0.09 | 0.00 | 0.00 | 0.00 | 0.00 | 0.00 | 0.01 | 0.00 | 0.01 | 1.07 |  |  |
| SAR2-8 | 8 | 6.10 | 1.19 | 0.01 | 0.27 | 1.47 | 13.07 | 27.32 | 10.32 | 3.61 | 1.18 | 0.78 | 2.76 | 2.84 | 31.69 | 0.00 | 102.62 | 23 | 9 |
| SAR2-8 | 9 | 3.96 | 0.86 | 0.01 | 0.16 | 1.02 | 14.72 | 28.73 | 10.53 | 3.74 | 1.26 | 0.67 | 2.79 | 1.70 | 31.90 | 0.07 | 102.11 | 13 | 9 |
| SAR2-9 | 10 | 7.06 | 0.32 | 0.01 | 1.00 | 0.80 | 15.70 | 29.61 | 8.76 | 3.17 | 0.74 | 0.44 | 2.71 | 1.79 | 29.18 | 0.00 | 101.27 | 8 | 7 |
| SAR2-10 | 11 | 0.30 | 0.11 | 0.00 | 0.03 | 0.13 | 17.65 | 33.01 | 11.34 | 3.72 | 0.35 | 0.10 | 3.24 | 0.70 | 31.58 | 0.01 | 102.27 |  |  |
| SAR2-11 | 12 | 0.53 | 0.00 | 0.01 | 0.27 | 0.29 | 22.54 | 34.16 | 6.53 | 3.19 | 0.04 | 0.00 | 2.70 | 0.51 | 31.31 | 0.00 | 102.07 | 120 | 123 |
| SAR2-12 | 13 | 6.57 | 0.52 | 0.01 | 0.67 | 1.05 | 13.62 | 28.01 | 10.03 | 3.76 | 1.30 | 0.79 | 2.83 | 2.43 | 30.47 | 0.01 | 102.05 | 24 | 12 |
| SAR2-13 | 14 | 1.21 | 0.02 | 0.00 | 0.06 | 0.29 | 16.73 | 32.87 | 10.74 | 4.10 | 0.91 | 0.32 | 3.08 | 0.61 | 30.93 | 0.01 | 101.87 |  |  |
| SAR2-14 | 15 | 4.62 | 0.43 | 0.01 | 0.21 | 1.29 | 15.03 | 30.14 | 10.99 | 3.48 | 0.94 | 0.12 | 3.05 | 0.36 | 31.19 | 0.39 | 102.24 | 26 | 15 |
| SAR2-15 | 16 | 6.25 | 0.60 | 0.02 | 0.50 | 1.16 | 14.20 | 28.69 | 9.50 | 3.48 | 1.09 | 0.64 | 2.70 | 2.20 | 31.29 | 0.00 | 102.32 | 44 | 14 |
| SAR2-16 | 17 | 5.15 | 0.86 | 0.01 | 0.52 | 1.01 | 14.95 | 29.16 | 9.19 | 3.63 | 0.94 | 0.62 | 2.72 | 2.84 | 31.00 | 0.00 | 102.60 | 8 | 6 |
| SAR2-17 | 18 | 6.99 | 0.73 | 0.01 | 0.73 | 1.15 | 14.05 | 27.58 | 9.35 | 3.41 | 0.98 | 0.75 | 2.64 | 3.18 | 31.03 | 0.00 | 102.58 | 9 | 7 |
| SAR2-18 | 19 | 5.14 | 0.60 | 0.01 | 0.24 | 1.09 | 15.20 | 29.83 | 10.90 | 3.58 | 0.98 | 0.17 | 2.95 | 0.39 | 31.14 | 0.00 | 102.23 | 22 | 12 |
| SAR2-19 | 20 | 4.79 | 0.66 | 0.03 | 0.09 | 1.23 | 13.56 | 28.80 | 10.69 | 3.32 | 1.19 | 0.62 | 2.80 | 1.93 | 31.04 | 0.01 | 100.73 | 86 | 19 |
| SAR2-20 | 21 | 8.11 | 0.75 | 0.00 | 0.99 | 1.16 | 12.95 | 28.12 | 10.38 | 3.21 | 0.84 | 0.49 | 2.83 | 2.18 | 29.57 | 0.00 | 101.58 |  |  |
| SAR2-21 | 22 | 3.64 | 0.01 | 0.00 | 0.50 | 0.31 | 14.57 | 31.41 | 11.54 | 4.08 | 1.27 | 0.28 | 3.20 | 0.51 | 31.19 | 0.00 | 102.50 |  |  |
| SAR2-22 | 23 | 4.94 | 1.48 | 0.03 | 0.04 | 1.47 | 14.36 | 29.25 | 9.67 | 3.38 | 0.92 | 0.49 | 2.75 | 1.62 | 32.04 | 0.01 | 102.45 | 73 | 13 |
| SAR2-23 | 24 | 5.30 | 0.74 | 0.01 | 0.21 | 1.23 | 14.65 | 29.88 | 10.68 | 3.55 | 1.09 | 0.24 | 2.90 | 0.53 | 31.26 | 0.01 | 102.26 | 14 | 9 |
| SAR2-24 | 25 | 14.09 | 1.26 | 0.59 | 0.95 | 2.89 | 10.38 | 24.48 | 8.83 | 2.83 | 0.67 | 0.30 | 2.47 | 1.20 | 29.54 | 0.00 | 100.48 | 721 | 14 |
| SAR2-25 | 26 | 0.05 | 0.37 | 0.01 | 0.04 | 0.10 | 19.07 | 34.63 | 9.07 | 3.28 | 0.34 | 0.12 | 3.14 | 0.74 | 31.41 | 0.00 | 102.35 | 90 | 67 |
| SAR2-26 | 27 | 9.11 | 0.24 | 0.41 | 0.73 | 1.60 | 13.17 | 28.97 | 10.24 | 3.53 | 0.86 | 0.03 | 2.89 | 0.17 | 30.55 | 0.01 | 102.51 | 918 | 24 |
| SAR2-27 | 28 | 2.42 | 0.03 | 0.15 | 0.37 | 0.55 | 17.04 | 31.91 | 10.56 | 3.73 | 0.84 | 0.15 | 3.02 | 0.31 | 31.10 | 0.32 | 102.49 | 1330 | 84 |
| SAR2-28 | 29 | 9.46 | 0.14 | 0.23 | 1.12 | 1.24 | 14.55 | 29.84 | 9.01 | 2.62 | 0.31 | 0.10 | 2.86 | 0.58 | 29.29 | 0.01 | 101.34 | 519 | 19 |
| SAR2-29 | 30 | 20.91 | 0.18 | 0.74 | 4.69 | 0.78 | 14.71 | 26.58 | 5.54 | 2.08 | 0.11 | 0.00 | 2.12 | 0.19 | 23.74 | 0.01 | 102.36 | 768 | 12 |
| SAR2-29b | 31 | 0.94 | 0.00 | 0.01 | 0.17 | 1.04 | 15.72 | 33.96 | 10.55 | 3.58 | 0.66 | 0.28 | 3.15 | 0.60 | 31.85 | 0.05 | 102.55 | 43 | 53 |
| SAR2-30 | 32 | 7.04 | 0.12 | 0.15 | 0.59 | 1.31 | 13.35 | 28.31 | 10.46 | 3.56 | 1.00 | 0.56 | 2.86 | 2.39 | 31.71 | 0.00 | 103.40 | 454 | 24 |
| SAR2-31 | 33 | 3.55 | 0.32 | 0.00 | 0.24 | 0.76 | 16.26 | 31.94 | 8.59 | 3.25 | 0.67 | 0.41 | 2.84 | 1.73 | 31.55 | 0.11 | 102.22 |  |  |
| SAR2-32 | 34 | 1.09 | 0.01 | 0.03 | 0.12 | 0.21 | 17.75 | 31.86 | 10.87 | 4.01 | 1.07 | 0.17 | 3.07 | 0.35 | 31.34 | 0.01 | 101.95 | 440 | 132 |
| SAR2-33 | 35 | 5.42 | 0.56 | 0.01 | 0.51 | 1.02 | 14.06 | 28.75 | 10.19 | 3.65 | 1.16 | 0.70 | 2.83 | 2.55 | 30.49 | 0.00 | 101.90 | 18 | 11 |
| SAR2-34 | 36 | 3.92 | 0.21 | 0.11 | 0.33 | 0.69 | 19.06 | 32.31 | 7.28 | 3.06 | 0.37 | 0.32 | 2.62 | 1.64 | 31.59 | 0.00 | 103.49 | 506 | 40 |
| SAR2-35 | 37 | 10.28 | 0.44 | 0.04 | 1.79 | 0.84 | 15.42 | 28.19 | 7.71 | 3.16 | 0.77 | 0.52 | 2.55 | 2.03 | 28.20 | 0.00 | 101.94 | 62 | 11 |
| SAR2-36 | 38 | 8.71 | 0.24 | 0.32 | 2.11 | 0.28 | 13.58 | 28.01 | 9.84 | 3.49 | 0.98 | 0.58 | 2.76 | 1.98 | 27.63 | 0.01 | 100.51 | 746 | 23 |
| SAR2-37c | 39 | 17.98 | 0.27 | 0.02 | 3.01 | 1.60 | 14.35 | 25.56 | 6.88 | 2.41 | 0.39 | 0.12 | 2.20 | 0.41 | 26.14 | 0.17 | 101.50 | 18 | 6 |
| SAR2-37r | 40 | 9.65 | 0.38 | 0.01 | 1.68 | 0.73 | 15.27 | 29.58 | 8.20 | 3.10 | 0.54 | 0.30 | 2.67 | 1.41 | 27.97 | 0.05 | 101.55 | 23 | 10 |
| SAR5-1 | 41 | 6.38 | 0.76 | 0.01 | 0.45 | 1.27 | 14.46 | 27.99 | 8.98 | 3.37 | 1.07 | 0.59 | 2.64 | 2.26 | 29.99 | 0.00 | 100.23 | 26 | 11 |
| SAR5-2 | 42 | 8.17 | 1.37 | 0.26 | 0.22 | 2.09 | 12.83 | 26.88 | 8.94 | 3.40 | 1.01 | 0.68 | 2.54 | 2.44 | 31.35 | 0.01 | 102.18 | 458 | 16 |
| SAR5-3 | 43 | 12.85 | 0.91 | 0.02 | 1.92 | 1.34 | 13.90 | 27.72 | 7.78 | 3.03 | 0.63 | 0.18 | 2.54 | 0.58 | 27.70 | 0.00 | 101.08 | 19 | 6 |
| SAR5-3b | 44 | 6.07 | 0.61 | 0.01 | 0.45 | 1.16 | 14.59 | 31.10 | 9.05 | 3.51 | 0.68 | 0.22 | 2.90 | 0.64 | 29.82 | 0.00 | 100.81 | 25 | 12 |
| SAR5-4 | 45 | 5.84 | 0.71 | 0.01 | 0.63 | 0.98 | 14.57 | 28.58 | 8.97 | 3.24 | 0.86 | 0.69 | 2.61 | 2.57 | 30.81 | 0.02 | 101.08 | 11 | 8 |
| SAR5-5 | 46 | 5.28 | 0.97 | 0.02 | 0.00 | 1.44 | 13.39 | 26.89 | 9.88 | 3.65 | 1.27 | 0.85 | 2.64 | 2.69 | 31.14 | 0.02 | 100.11 | 35 | 12 |
| SAR5-6 | 47 | 20.55 | 0.79 | 0.01 | 1.37 | 3.72 | 10.27 | 21.02 | 6.66 | 2.38 | 0.73 | 0.57 | 1.99 | 1.86 | 28.89 | 0.00 | 100.81 | 8 | 4 |
| SAR5-7 | 48 | 6.08 | 0.01 | 0.11 | 1.28 | 1.05 | 15.27 | 25.93 | 10.71 | 4.24 | 1.65 | 0.42 | 2.50 | 1.32 | 29.35 | 0.05 | 99.98 | 411 | 27 |
| SAR5-8 | 49 | 0.00 | 0.00 | 0.33 | 0.12 | 0.53 | 0.00 | 0.09 | 0.00 | 0.00 | 0.00 | 0.00 | 0.00 | 0.00 | 0.00 | 0.00 | 1.06 |  |  |
| SAR5-9 | 50 | 14.45 | 0.48 | 0.01 | 2.28 | 1.23 | 11.73 | 25.20 | 8.63 | 3.24 | 1.09 | 0.63 | 2.47 | 1.96 | 27.20 | 0.00 | 100.57 | 3 | 2 |
| SAR5-10 | 51 | 9.71 | 0.03 | 0.43 | 1.37 | 1.14 | 14.51 | 29.95 | 9.59 | 2.80 | 0.40 | 0.08 | 2.89 | 0.28 | 29.12 | 0.01 | 102.31 | 962 | 22 |
| SAR5-11 | 52 | 0.00 | 0.00 | 0.32 | 0.21 | 0.47 | 0.02 | 0.12 | 0.00 | 0.00 | 0.00 | 0.31 | 0.00 | 0.00 | 0.00 | 0.00 | 1.45 |  |  |
| SAR5-12 | 53 | 5.29 | 0.28 | 0.14 | 0.19 | 1.18 | 13.26 | 28.39 | 10.48 | 3.41 | 1.07 | 0.66 | 2.86 | 2.38 | 30.91 | 0.00 | 100.47 | 496 | 31 |
| SAR5-13 | 54 | 2.84 | 0.00 | 0.23 | 0.35 | 0.25 | 16.59 | 33.47 | 10.19 | 3.55 | 0.57 | 0.12 | 3.14 | 0.36 | 30.96 | 0.00 | 102.61 | 1714 | 70 |
| SAR5-14 | 55 | 17.38 | 0.55 | 0.01 | 1.93 | 2.28 | 9.75 | 22.57 | 7.75 | 4.14 | 1.43 | 0.65 | 2.28 | 1.94 | 27.45 | 0.00 | 100.11 | 12 | 5 |
| SAR5-15 | 56 | 9.20 | 0.94 | 0.01 | 1.06 | 1.38 | 14.97 | 29.41 | 8.86 | 3.33 | 0.69 | 0.16 | 2.77 | 0.56 | 30.25 | 0.00 | 103.58 | 5 | 4 |
| SAR5-16 | 57 | 6.10 | 0.21 | 0.01 | 1.14 | 0.36 | 14.72 | 29.96 | 10.36 | 4.14 | 1.36 | 0.37 | 2.96 | 0.76 | 29.89 | 0.00 | 102.33 | 6 | 7 |
| SAR5-17 | 58 | 9.08 | 0.82 | 0.01 | 1.14 | 1.23 | 15.95 | 29.60 | 7.76 | 3.13 | 0.49 | 0.08 | 2.65 | 0.24 | 29.15 | 0.01 | 101.33 | 15 | 7 |
| SAR5-18 | 59 | 20.54 | 0.51 | 0.01 | 1.52 | 3.37 | 10.29 | 21.70 | 6.59 | 2.43 | 0.81 | 0.49 | 2.07 | 1.88 | 27.81 | 0.00 | 100.00 | 9 | 4 |
| SAR5-19 | 60 | 0.00 | 0.00 | 0.32 | 0.13 | 0.52 | 0.01 | 0.07 | 0.00 | 0.00 | 0.00 | 0.00 | 0.00 | 0.00 | 0.00 | 0.00 | 1.05 |  |  |
| SAR5-20 | 61 | 8.02 | 1.00 | 0.02 | 0.76 | 1.43 | 14.49 | 29.01 | 9.64 | 3.45 | 0.81 | 0.25 | 2.82 | 0.85 | 30.46 | 0.00 | 103.00 | 28 | 9 |
| SAR5-21 | 62 | 5.35 | 2.41 | 0.18 | 0.08 | 1.78 | 13.90 | 28.22 | 9.16 | 3.44 | 0.90 | 0.59 | 2.63 | 2.28 | 32.16 | 0.00 | 103.07 | 307 | 14 |
| SAR5-22 | 63 | 6.07 | 0.78 | 0.01 | 0.33 | 1.30 | 14.89 | 29.72 | 10.32 | 3.56 | 1.03 | 0.24 | 2.90 | 0.67 | 31.39 | 0.00 | 103.20 | 18 | 9 |
| SAR5-23 | 64 | 5.59 | 0.82 | 0.02 | 0.18 | 1.35 | 14.62 | 29.06 | 10.04 | 3.44 | 1.07 | 0.50 | 2.78 | 1.41 | 31.53 | 0.00 | 102.40 | 33 | 12 |
| SAR5-24 | 65 | 8.73 | 0.36 | 0.76 | 0.74 | 1.61 | 15.19 | 27.35 | 7.56 | 2.95 | 0.68 | 0.42 | 2.40 | 1.74 | 29.90 | 0.00 | 100.38 | 1654 | 32 |
| SAR5-25 | 66 | 7.06 | 1.12 | 0.02 | 0.37 | 1.62 | 14.46 | 28.66 | 9.77 | 3.43 | 1.09 | 0.43 | 2.80 | 1.06 | 30.81 | 0.04 | 102.72 | 28 | 9 |
| SAR7-1 | 67 | 8.741 | 2.646 | 0.022 | 0.317 | 2.327 | 13.72 | 28.585 | 2.9915 | 8.393 | 0.6015 | 0.2374 | 2.711 | 0.756 | 31.75 | 0 | 103.8 | 26 | 6 |
| SAR7-2c | 68 | 16.55 | 1.449 | 0.033 | 2.891 | 1.399 | 11.8 | 25.147 | 2.7817 | 8.5302 | 0.5882 | 0.1375 | 2.519 | 0.342 | 25.83 | 0 | 100 | 32 | 6 |
| SAR7-2r | 69 | 8.921 | 1.542 | 0.023 | 0.313 | 2.169 | 12.22 | 26.64 | 3.3528 | 9.5133 | 1.0671 | 0.6186 | 2.7 | 2.427 | 31.62 | 0 | 103.1 | 33 | 8 |
| SAR7-3 | 70 | 5.879 | 0.981 | 0.012 | 0.111 | 1.499 | 13.48 | 27.191 | 3.6571 | 9.9423 | 1.0841 | 0.7866 | 2.674 | 2.904 | 31.65 | 0 | 101.8 | 22 | 10 |
| SAR7-4 | 71 | 14.44 | 1.209 | 0.027 | 2.287 | 1.496 | 14.92 | 28.102 | 2.6056 | 6.6057 | 0.3727 | 0.1116 | 2.506 | 0.279 | 27.32 | 0 | 102.3 | 29 | 6 |
| SAR7-4 | 72 | 6.554 | 0.982 | 0.015 | 0.749 | 1.128 | 14.01 | 29.384 | 3.6444 | 9.9992 | 0.9242 | 0.2244 | 2.937 | 0.804 | 29.72 | 0.01 | 101.1 | 28 | 10 |
| SAR7-5 | 73 | 7.098 | 2.423 | 0.018 | 0.3 | 1.948 | 12.34 | 27.172 | 3.6843 | 9.838 | 1.2533 | 0.5714 | 2.721 | 1.989 | 30.77 | 0 | 102.1 | 23 | 6 |
| SAR7-6 | 74 | 9.371 | 1.318 | 0.018 | 1.192 | 1.414 | 14.95 | 29.471 | 3.0339 | 8.7069 | 0.5502 | 0.0412 | 2.696 | 0.23 | 29.98 | 0 | 103 | 25 | 7 |
| SAR7-7 | 75 | 7.397 | 2.217 | 0.016 | 0.325 | 2.022 | 13.63 | 26.695 | 3.5739 | 7.9396 | 1.0932 | 0.8178 | 2.505 | 2.915 | 31.41 | 0 | 102.6 | 21 | 6 |
| SAR7-8 | 76 | 4.348 | 0.674 | 0.012 | 0.258 | 0.93 | 14.78 | 29.341 | 3.366 | 9.544 | 0.9421 | 0.6476 | 2.818 | 2.755 | 31.6 | 0 | 102 | 31 | 15 |
| SAR7-9 | 77 | 9.902 | 1.074 | 0.024 | 0.647 | 1.973 | 12.49 | 26.293 | 3.4209 | 8.4766 | 1.1 | 0.7845 | 2.407 | 2.849 | 31.02 | 0.01 | 102.5 | 35 | 9 |
| SAR7-10 | 78 | 8.554 | 1.602 | 0.015 | 0.3 | 2.081 | 13.47 | 27.262 | 3.2296 | 8.3267 | 0.8539 | 0.5348 | 2.499 | 1.756 | 30.62 | 0 | 101.1 | 20 | 7 |
| SAR7-10 | 79 | 4.466 | 1.032 | 0.011 | 0.093 | 1.23 | 13.92 | 28.236 | 3.6156 | 10.293 | 1.2177 | 0.6613 | 2.84 | 2.525 | 31.62 | 0.02 | 101.8 | 22 | 10 |
| SAR7-12 | 80 | 7.379 | 0.341 | 0.009 | 1.284 | 0.638 | 12.28 | 28.445 | 4.3021 | 10.289 | 1.6374 | 0.9023 | 2.868 | 1.832 | 29.21 | 0.01 | 101.4 | 16 | 10 |
| SAR7-13 | 81 | 13.38 | 1.756 | 0.019 | 0.964 | 2.591 | 11.89 | 24.668 | 3.0328 | 7.8593 | 0.9192 | 0.4556 | 2.315 | 1.5 | 28.83 | 0.01 | 100.2 | 19 | 5 |
| SAR7-14 | 82 | 13.07 | 1.212 | 0.025 | 0.92 | 2.417 | 12.4 | 24.836 | 3.0414 | 6.7628 | 0.8077 | 0.6366 | 2.286 | 2.531 | 29.56 | 0 | 100.5 | 30 | 7 |
| SAR7-15 | 83 | 8.229 | 0.262 | 0.02 | 1.608 | 0.595 | 11.94 | 28.386 | 3.9846 | 10.192 | 1.3663 | 0.7386 | 2.943 | 1.872 | 28.88 | 0.2 | 101.2 | 42 | 14 |
| SAR7-16 | 84 | 8.695 | 1.61 | 0.011 | 0.329 | 2.062 | 12.91 | 26.084 | 3.6075 | 9.2911 | 1.2804 | 0.6317 | 2.579 | 2.065 | 31.22 | 0 | 102.4 | 14 | 5 |
| SAR7-17 | 85 | 10.33 | 1.409 | 0.018 | 0.752 | 2.019 | 12.48 | 26.612 | 3.389 | 8.7942 | 1.0332 | 0.4861 | 2.542 | 1.517 | 30.07 | 0 | 101.5 | 24 | 7 |
| SAR7-18 | 86 | 10.96 | 0.588 | 0.016 | 0.992 | 1.725 | 11.59 | 25.767 | 3.608 | 9.2786 | 1.2741 | 0.7622 | 2.593 | 2.148 | 29.7 | 0 | 101 | 23 | 8 |
| SAR7-19 | 87 | 11.11 | 1.261 | 0.025 | 1.454 | 1.479 | 13.68 | 28.527 | 3.2112 | 8.707 | 0.6027 | 0.1189 | 2.64 | 0.38 | 28.8 | 0.01 | 102 | 33 | 8 |
| SAR7-20 | 88 | 8.504 | 0.266 | 0.013 | 1.873 | 0.401 | 11.43 | 27.735 | 4.6357 | 11.038 | 1.606 | 0.7368 | 2.915 | 2.051 | 28.17 | 0.25 | 101.6 | 24 | 11 |
| SAR7-21 | 89 | 7.143 | 3.585 | 0.018 | 0.198 | 2.275 | 11.88 | 25.581 | 3.3639 | 8.9986 | 1.1778 | 0.6929 | 2.522 | 2.671 | 31.75 | 0 | 101.9 | 18 | 4 |
| SAR7-22 | 90 | 6.301 | 0.911 | 0.008 | 0.148 | 1.558 | 13.92 | 27.863 | 3.2612 | 9.7201 | 0.949 | 0.6161 | 2.695 | 2.727 | 31.56 | 0 | 102.2 | 11 | 7 |
| SAR7-23 | 91 | 7.644 | 2.844 | 0.02 | 0.267 | 2.205 | 12.46 | 26.056 | 3.3425 | 8.7115 | 1.1049 | 0.7399 | 2.497 | 2.553 | 30.88 | 0 | 101.3 | 23 | 5 |
| SAR7-24 | 92 | 4.7 | 0.922 | 0.011 | 0.109 | 1.211 | 13.75 | 28.096 | 3.6809 | 9.9293 | 1.2225 | 0.7416 | 2.718 | 2.588 | 31.72 | 0 | 101.4 | 24 | 11 |
| SAR7-25 | 93 | 7.24 | 1.116 | 0.013 | 0.248 | 1.71 | 12.94 | 27.488 | 3.6018 | 9.7407 | 1.1117 | 0.5631 | 2.734 | 1.923 | 31.18 | 0 | 101.6 | 21 | 8 |
| SAR7-26 | 94 | 8.708 | 1.189 | 0.015 | 0.747 | 1.591 | 14.06 | 29.137 | 3.1414 | 9.409 | 0.7524 | 0.1245 | 2.827 | 0.51 | 30.6 | 0 | 102.8 | 21 | 8 |
| SAR7-27 | 95 | 5.811 | 2.515 | 0.02 | 0.163 | 1.792 | 12.85 | 26.177 | 3.4154 | 9.4986 | 1.2199 | 0.8196 | 2.561 | 3.265 | 31.58 | 0 | 101.7 | 28 | 7 |
| SAR7-28 | 96 | 6.139 | 0.793 | 0.017 | 0.377 | 1.265 | 14.66 | 28.322 | 3.4341 | 9.816 | 1.0699 | 0.6778 | 2.75 | 2.141 | 31.77 | 0 | 103.2 | 35 | 12 |
| SAR7-29 | 97 | 6.368 | 0.609 | 0.011 | 0.313 | 1.282 | 14.34 | 27.798 | 3.6469 | 9.5741 | 1.084 | 0.5883 | 2.722 | 1.681 | 30.37 | 0 | 100.4 | 22 | 11 |
| SAR7-30 | 98 | 7.33 | 0.73 | 0.013 | 0.603 | 1.309 | 11.26 | 27.427 | 4.2875 | 10.432 | 1.4624 | 0.8032 | 2.81 | 2.484 | 30.85 | 0 | 101.8 | 23 | 10 |
| SAR7-31 | 99 | 9.223 | 1.378 | 0.02 | 0.536 | 1.949 | 12.89 | 26.591 | 3.3742 | 8.9295 | 1.0499 | 0.6598 | 2.613 | 2.245 | 30.8 | 0 | 102.3 | 28 | 8 |
| SAR7-32 | 100 | 0 | 0 | 0.236 | 0.134 | 0.514 | 0.002 | 0.1107 | 0.0193 | 0 | 0 | 0.0385 | 0 | 0.009 | 0.02 | 0 | 1.087 |  |  |
| SAR7-33 | 101 | 7.186 | 1.176 | 0.02 | 0.304 | 1.646 | 13.44 | 26.784 | 3.4849 | 9.62 | 1.2308 | 0.6692 | 2.657 | 2.44 | 31.5 | 0.01 | 102.2 | 35 | 10 |
| SAR7-34 | 102 | 0 | 0 | 0.239 | 0.193 | 0.501 | 0.031 | 0.0829 | 0 | 0 | 0 | 0.2739 | 2E-04 | 0 | 0 | 0.01 | 1.335 |  |  |
| SAR7-35 | 103 | 16.05 | 0.922 | 0.024 | 1.139 | 2.878 | 11.13 | 23.226 | 3.2145 | 7.0634 | 0.917 | 0.7227 | 2.196 | 2.469 | 29.23 | 0 | 101.2 | 25 | 6 |
| SAR7-35 | 104 | 14.05 | 1.381 | 0.026 | 1.993 | 1.701 | 13.44 | 26.241 | 2.9116 | 8.3507 | 0.6306 | 0.1159 | 2.455 | 0.371 | 27.35 | 0 | 101 | 28 | 6 |
